# Supplementary material
Source: Royal Society of Chemistry journal article supplement (doi:10.1039/d5tb02810h)
Supplement: d5tb02810h1.pdf [file d5tb02810h1.pdf]

# Supporting Information

**Versatile MOFs with dual-enzyme-mimetic activities for cancer**

**hypoxia relief and assisted photodynamic therapy upon fluorescence**

**imaging**

Xiaotong Li<sup>a</sup>, Haoyun Shi<sup>a</sup>, Zimeng Zhou<sup>a</sup>, Linshan Jia<sup>a</sup>, Xiaohong Hou<sup>b\*</sup>

*a School of Pharmacy, Shenyang Pharmaceutical University, Shenyang, Liaoning Province,  
110016, PR China*

*b School of Pharmaceutical Engineering, Shenyang Pharmaceutical University, Shenyang,  
Liaoning Province, 110016, PR China*

*\* Corresponding author. School of Pharmaceutical Engineering, Shenyang Pharmaceutical  
University, Shenyang, Liaoning Province, 110016, PR China.*

*Email address of the corresponding author: syphu\_houxiaohong@163.com (X. Hou).*

*Phone numbers of the corresponding author: 024-43520212 (X. Hou).*

## Content

14

|    |                                                                                               |    |
|----|-----------------------------------------------------------------------------------------------|----|
| 15 | <b>Supporting Information</b> .....                                                           | 1  |
| 16 | 1. Main reagents.....                                                                         | 3  |
| 17 | 2. Main instruments .....                                                                     | 3  |
| 18 | 3. Loading and release of H <sub>4</sub> adip.....                                            | 4  |
| 19 | 4. Biological safety .....                                                                    | 5  |
| 20 | 5. The structure of H <sub>4</sub> adip.....                                                  | 6  |
| 21 | 6. The result of loading and release of H <sub>4</sub> adip.....                              | 7  |
| 22 | 7. Particle size distribution profile of HPC.....                                             | 7  |
| 23 | 8. EDS spectrum of HPC .....                                                                  | 8  |
| 24 | 9. Photos of H <sub>4</sub> adip, PCN-222, HP, and HPC dispersed in an aqueous solution ..... | 8  |
| 25 | 10. N <sub>2</sub> adsorption/desorption test.....                                            | 9  |
| 26 | 11. Fluorescence spectra of PCN-222, H <sub>4</sub> adip, and HPC .....                       | 10 |
| 27 | 12. The CAT-like activity and enzyme kinetic properties of HPC.....                           | 10 |
| 28 | 13. Effect of pH on the CAT-like activity of HPC .....                                        | 11 |
| 29 | 14. Photos of oxTMB of HPC with H <sub>2</sub> O <sub>2</sub> .....                           | 11 |
| 30 | 15. The POD-like activity and enzyme kinetic properties of HPC.....                           | 12 |
| 31 | 16. Effect of pH on the POD-like activity of HPC .....                                        | 12 |
| 32 | 17. UV-vis absorbance spectral changes of DPBF over time after different treatments .....     | 13 |
| 33 | 18. The <sup>1</sup> O <sub>2</sub> generating ability of CeO <sub>2</sub> nanozyme .....     | 13 |

|    |                                                                                                                                                                    |    |
|----|--------------------------------------------------------------------------------------------------------------------------------------------------------------------|----|
| 34 | 19. Fluorescence spectral changes of HPC over time after different treatments .....                                                                                | 14 |
| 35 | 20. Schematic diagram of the reaction between H <sub>4</sub> adip and <sup>1</sup> O <sub>2</sub> .....                                                            | 14 |
| 36 | 21. Validation of HPC sensitivity for <sup>1</sup> O <sub>2</sub> detection using the Na <sub>2</sub> MoO <sub>4</sub> /H <sub>2</sub> O <sub>2</sub> system ..... | 15 |
| 37 | 22. The result of biological safety.....                                                                                                                           | 15 |
| 38 | 23. Cytotoxicity of H <sub>2</sub> O <sub>2</sub> .....                                                                                                            | 16 |
| 39 | 24. Cell viability of MCF-7 cells under different irradiation time .....                                                                                           | 16 |
| 40 | 25. Cytotoxicity of ·OH .....                                                                                                                                      | 17 |
| 41 | 26. Live/dead staining.....                                                                                                                                        | 18 |
| 42 | 27. Recently reported nanomaterials-based methods for determination of <sup>1</sup> O <sub>2</sub> .....                                                           | 19 |
| 43 |                                                                                                                                                                    |    |

## 45 **1. Main reagents**

### 46 **Text S1.** Main reagents

47 All reagents were commercially purchased and used directly without purification.  
48 Zirconium Oxychloride Octahydrate ( $ZrOCl_2 \cdot 8H_2O$ ), L(+)-Arginine, Cerium (III) nitrate  
49 hexahydrate ( $Ce(NO_3)_3 \cdot 6H_2O$ ) and Dichloroacetic acid were purchased from Aladdin  
50 Reagent Company (Shanghai, China). 1,3-diphenylisobenzofuran (DPBF), 3-(4,5-  
51 dimethylthiazol-2-yl)-2,5-diphenyl-tetrazolium bromide (MTT), sodium hypochlorite  
52 ( $NaClO$ ) and 5,5'-(anthracene-9,10-dial)-diisophthalic acid ( $H_4adip$ ) were gained from Macklin  
53 Biochemical Co., Ltd (Shanghai, China). Dulbecco's modified Eagle's medium (DMEM),  
54 phosphate buffer saline (PBS), 2-(4-Amidinophenyl)-6-indolecarbamidine dihydrochloride  
55 (DAPI), Calcein-AM/PI double stain kit and cellular singlet oxygen detection assay kit  
56 (DCFH-DA) were purchased from Meilun Biotechnology Co., Ltd (Dalian, China). Dimethyl  
57 sulfoxide (DMSO), N, N-dimethylformamide (DMF), and ethanol were purchased from Fuyu  
58 Fine Chemicals Co., Ltd (Tianjin, China). Other chemicals and solvents were of analytical  
59 grade.

## 60 **2. Main instruments**

### 61 **Text S2.** Main instruments

62 UV-vis spectra were conducted on a Shimadzu UV-2450 spectrophotometer. Fluorescence  
63 spectra were performed with a Yidian 970CRT spectrophotometer. Confocal laser scanning  
64 microscopy (CLSM) images were obtained using a Nikon C2 confocal laser scanning  
65 microscope. Inverted fluorescence imaging was detected by Primovert inverted microscope.  
66 The generated oxygen was determined with the HI9146 portable dissolved oxygen meter  
67 (Hanna Instruments, Italy). MTT cytotoxicity assay was performed on a multi-mode microplate  
68 reader (Thermo Varioskan Flash, USA).

### 69 **3. Loading and release of H<sub>4</sub>adip**

#### 70 **Text S3.** Loading and release of H<sub>4</sub>adip

##### 71 3.1 Preparation of standard curve

72 A stock solution of H<sub>4</sub>adip with a concentration of 1 mg·mL<sup>-1</sup> was prepared in DMF as the  
73 solvent and dispersed by ultrasonication. Appropriate volumes of the stock solution were  
74 accurately measured, transferred into volumetric flasks, diluted to the mark with ethanol, and  
75 shaken well to obtain a series of standard solutions with concentrations of 5, 10, 20, 40, 50, 60,  
76 and 80 µg·mL<sup>-1</sup>. The absorbance of each solution was measured at 373 nm. A standard curve  
77 was constructed by linear regression with concentration as the abscissa and the mean  
78 absorbance as the ordinate.

##### 79 3.2 Determination of loading capacity

80 A DMF solution of H<sub>4</sub>adip (5 mL, 24 mg·mL<sup>-1</sup>) was added dropwise to an ethanol solution  
81 of PCN-222 (30 mL, 2 mg·mL<sup>-1</sup>). The mixture was then stirred continuously in the dark at 60°C  
82 for 24 h. Collect (200 µL) of the reaction solution were collected at 0, 1, 2, 3, 4, 8, 12, and 24  
83 h, diluted with anhydrous ethanol to 3 mL, and thoroughly mixed. The UV absorbance of each  
84 sample was measured at 373 nm, and each time point was sampled and measured in triplicate.  
85 The average absorbance values were substituted into the standard curve to calculate the mass  
86 of unloaded H<sub>4</sub>adip in the solution, and the loading capacity and loading efficiency were further  
87 determined.

##### 88 3.3 Investigation of release behavior

89 HPC (2 mg·mL<sup>-1</sup>) was added to water, PBS (pH 6.5), and RPMI-1640 medium,  
90 respectively, and mixed thoroughly to form the release systems. Each release system was  
91 incubated under identical conditions, and an equal volume of solution was added immediately  
92 after sample collection. Samples were collected at 0, 12, 24, 36, 48, 60, and 72 h, and

93 centrifuged at 10,000 rpm for 10 min. The supernatants were filtered, and the filtrates were  
94 collected. The absorbance of the filtrates at 373 nm was measured using a UV-vis  
95 spectrophotometer. The mass of H<sub>4</sub>adip released into different mediums was calculated by  
96 substituting the absorbance values into the standard curve.

#### 97 **4. Biological safety**

##### 98 **Text S4.** Biological safety

99 MCF-7 cells were inoculated in 96-well plates, and 200  $\mu$ L of cell suspension was added  
100 to each well, and three replicates per group were established. Blank control group was added  
101 with equal amount of PBS and incubated in a cell culture incubator for 24 h. Subsequently, the  
102 original medium was replaced with HP and HPC mixes at different concentrations (0, 6.25,  
103 12.5, 25, 50, 100, and 200  $\mu$ g $\cdot$ mL<sup>-1</sup>). After 12 h of incubation, the culture was washed with PBS  
104 and 100  $\mu$ L of new medium was added to each well with 20  $\mu$ L of MTT solution (5 mg $\cdot$ mL<sup>-1</sup>).  
105 After continuing the incubation for 4 h, the medium was removed, 150  $\mu$ L DMSO was added  
106 to each well, and the OD value at 490 nm was measured using an enzyme marker and the cell  
107 viability was calculated. The biocompatibility assay for 293T cells, HepaRG hepatocytes, and  
108 HK-2 renal cells was performed in the same way as described above. The cell viability was  
109 calculated as follows:

110 The biocompatibility assay of 293T cells was performed in the same way as described  
111 above. The cell viability was calculated as follows:

$$112 \quad \text{Cell Viability (\%)} = \frac{OD_{\text{sample}} - OD_{\text{blank}}}{OD_{\text{control}} - OD_{\text{blank}}} \times 100\%$$

113 where  $OD_{\text{sample}}$ ,  $OD_{\text{blank}}$ , and  $OD_{\text{control}}$  represent the optical density values of the  
114 experimental, blank, and control groups, respectively.

115 To assess the tumor specificity and off-target toxicity risk of the HPC nanoplatfrom, we  
116 calculated the ratio of tumor cell viability to normal cell viability.

### 117 5. The structure of H<sub>4</sub>adip

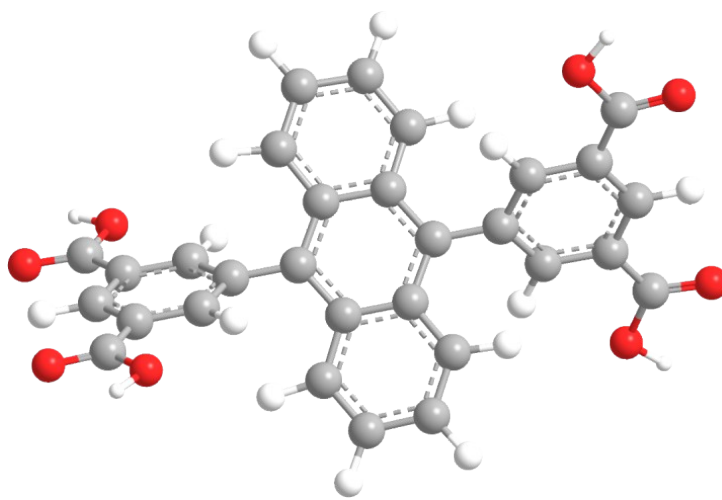

118

119

**Fig. S1.** The structure of H<sub>4</sub>adip.

121 **6. The result of loading and release of H<sub>4</sub>adip**

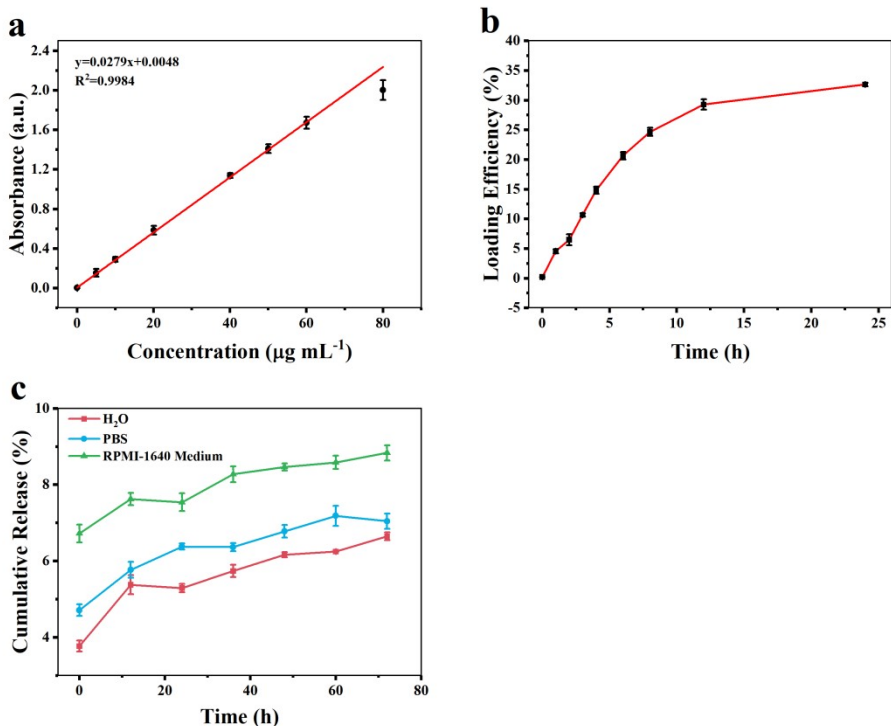

122

123 **Fig. S2.** (a) Standard calibration curve of H<sub>4</sub>adip in ethanol ( $\lambda = 373$  nm). (b) Calculated loading efficiency

124 of H<sub>4</sub>adip. (c) Cumulative release profile of H<sub>4</sub>adip from HPC at different media.

125

126 **7. Particle size distribution profile of HPC.**

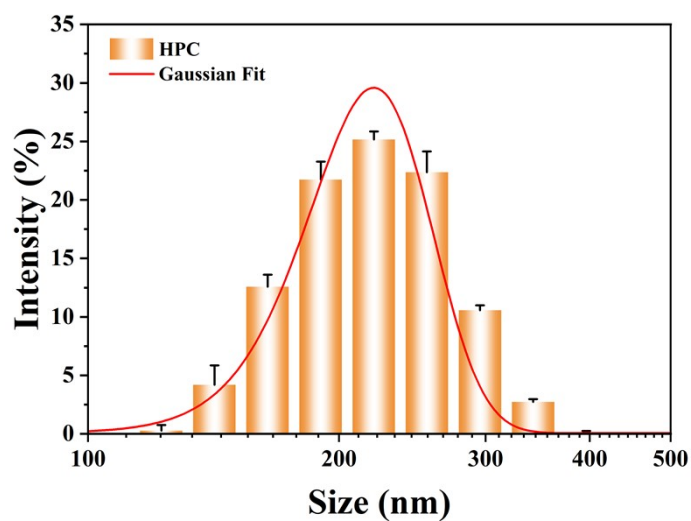

127

128

**Fig. S3.** Particle size distribution profile of HPC.

129

130 **8. EDS spectrum of HPC**

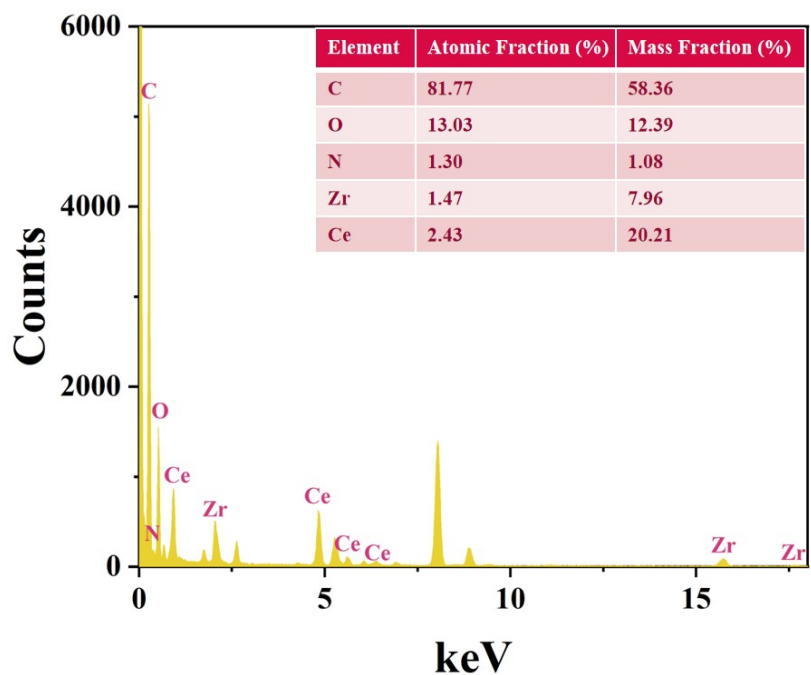

131

132

Fig. S4. EDS spectrum of HPC.

133

134 **9. Photos of H<sub>4</sub>adip, PCN-222, HP, and HPC dispersed in an aqueous solution**

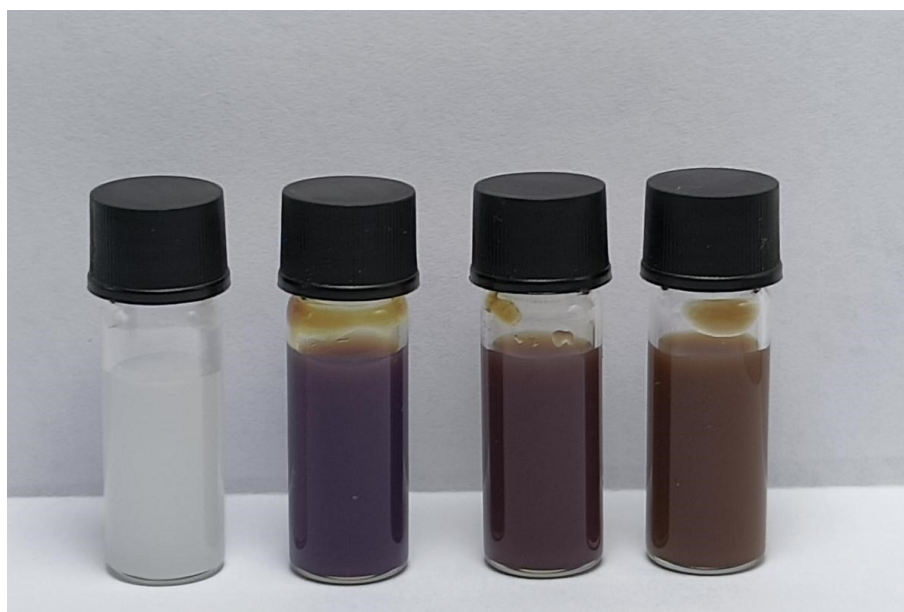

135

136 **Fig. S5.** Photos of H<sub>4</sub>adip, PCN-222, HP, and HPC dispersed in an aqueous solution during HPC synthesis

137

process.

138

139 10. N<sub>2</sub> adsorption/desorption test

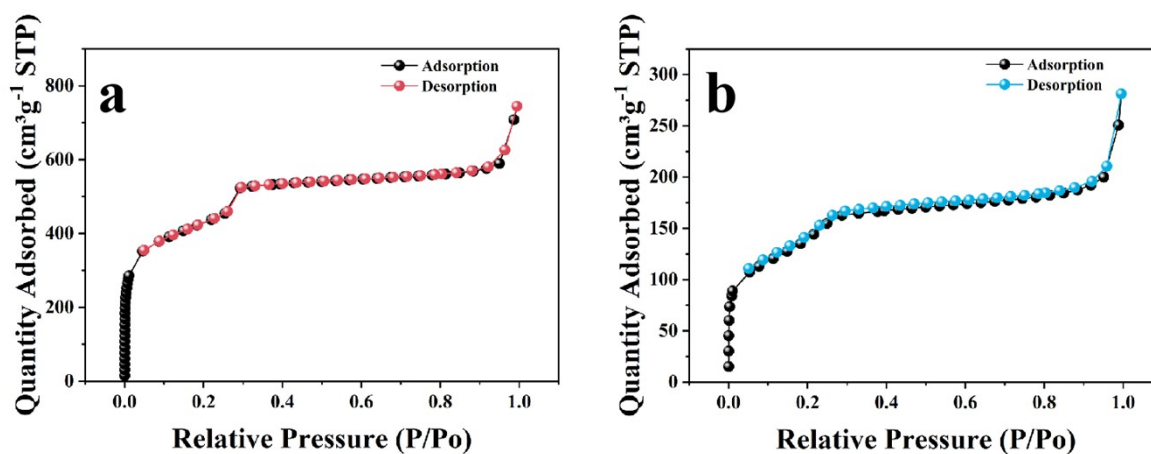

140

141

Fig. S6. N<sub>2</sub> adsorption/desorption isotherms of PCN-222 (a) and HP (b).

142

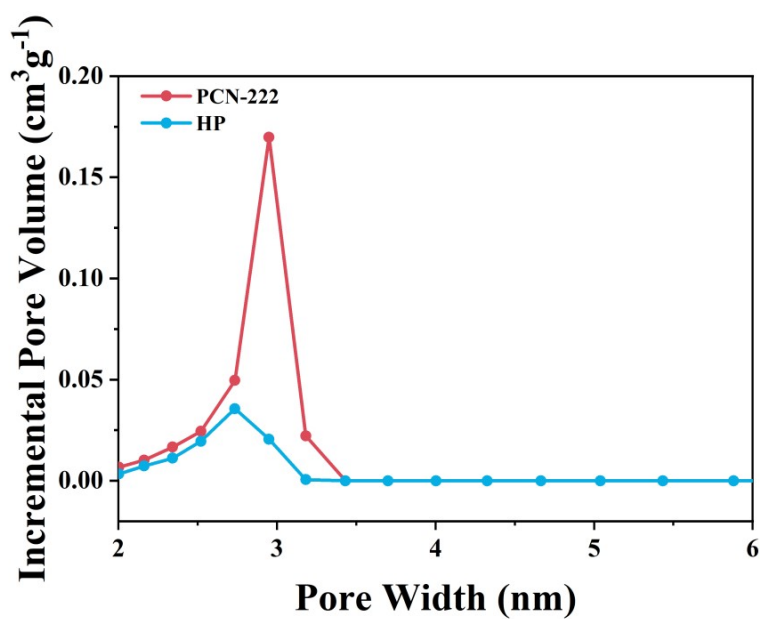

143

144

Fig. S7. Pore size distribution of PCN-222 and HP nanoparticles.

145

146

Table. S1. Specific surface area and pore volume of PCN-222 and H<sub>4</sub>adip@PCN-222.

| Material                    | BET Surface Area (m <sup>2</sup> g <sup>-1</sup> ) | Pore Volume (cm <sup>3</sup> g <sup>-1</sup> ) |
|-----------------------------|----------------------------------------------------|------------------------------------------------|
| PCN-222                     | 1546.70                                            | 1.15                                           |
| H <sub>4</sub> adip@PCN-222 | 508.03                                             | 0.43                                           |

147

148 **11. Fluorescence spectra of PCN-222, H<sub>4</sub>adip, and HPC**

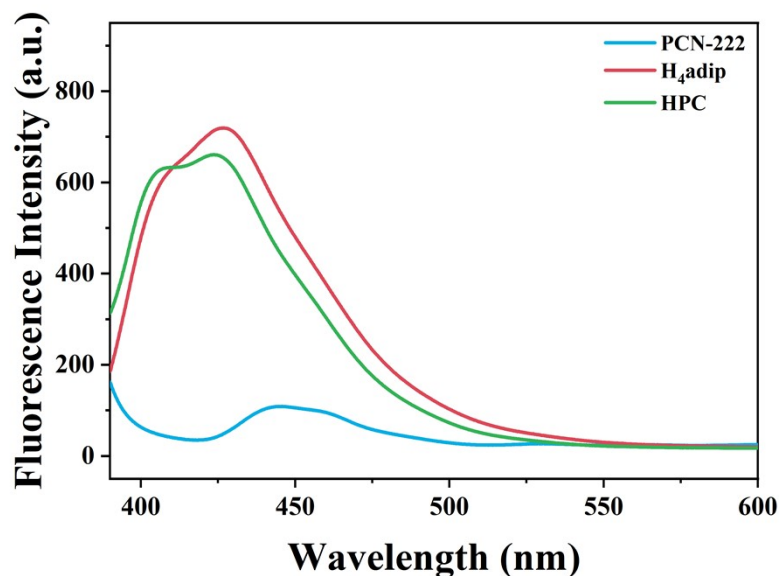

149  
150  
151

**Fig. S8.** Fluorescence spectra of PCN-222, H<sub>4</sub>adip, and HPC ( $\lambda_{ex}$ =379 nm).

152

153 **12. The CAT-like activity and enzyme kinetic properties of HPC**

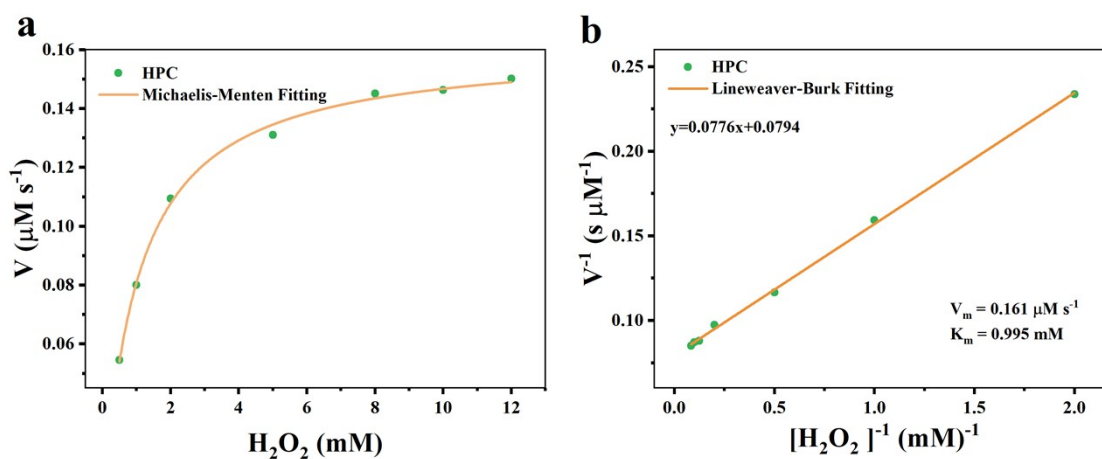

154

155 **Fig. S9.** (a) Michaelis-Menten kinetic fitting for CAT-like activity of HPC at different H<sub>2</sub>O<sub>2</sub> concentrations

156 (0.5 - 12 mM). (b) Lineweaver-Burk plot of CAT-like activity of HPC derived from the Michaelis-Menten

157 equation.

158

159

160 13. Effect of pH on the CAT-like activity of HPC

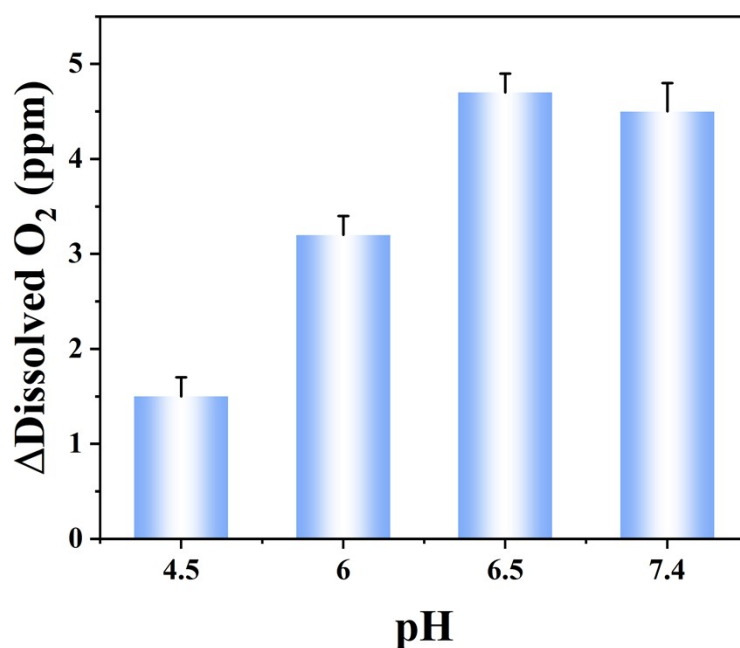

161

162

Fig. S10. The amount of O<sub>2</sub> generated from H<sub>2</sub>O<sub>2</sub> catalyzed by HPC under different pH.

163

164

165 14. Photos of oxTMB of HPC with H<sub>2</sub>O<sub>2</sub>

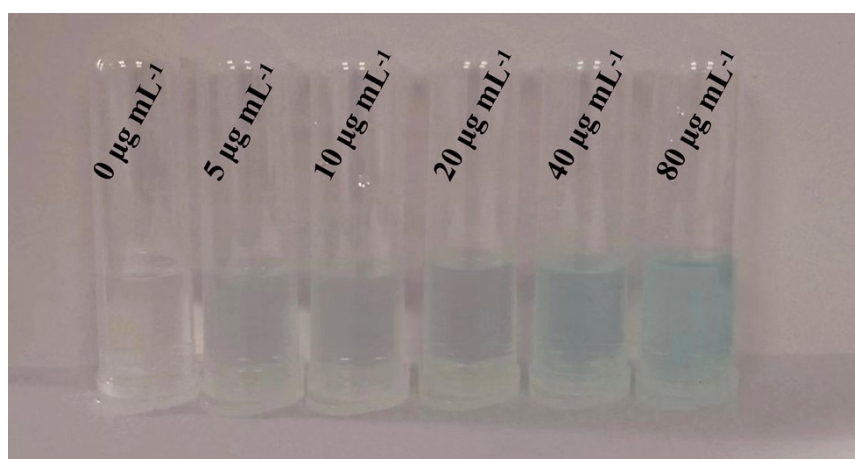

166

167

Fig. S11. Photos of oxTMB of different concentrations of HPC (0, 5, 10, 20, 40, and 80 μg·mL<sup>-1</sup>) with

168

H<sub>2</sub>O<sub>2</sub> (10 mM).

169

170 **15. The POD-like activity and enzyme kinetic properties of HPC**

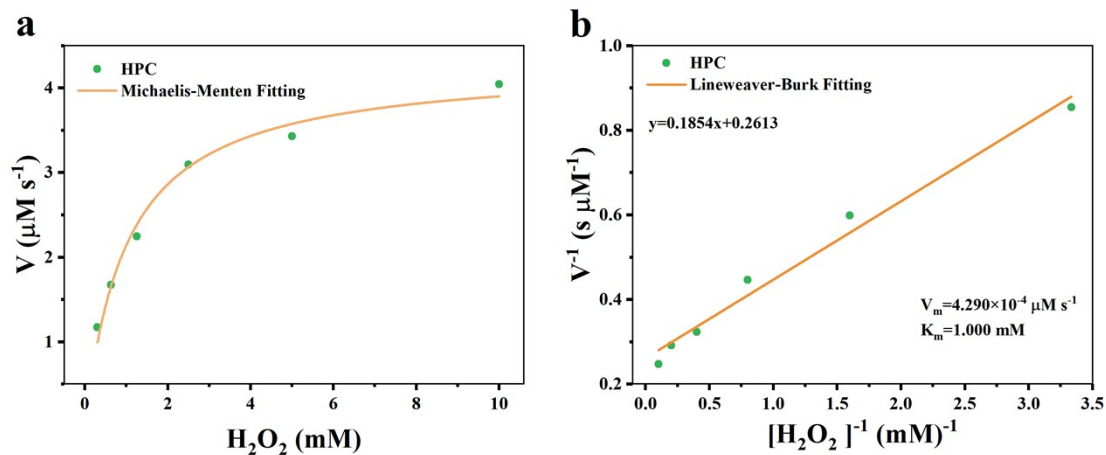

171

172

**Fig. S12.** (a) Michaelis-Menten kinetic fitting for POD-like activity of HPC at different  $\text{H}_2\text{O}_2$

173 concentrations (0.3 - 10 mM). (b) Lineweaver-Burk plot of POD-like activity of HPC derived from the

174

Michaelis-Menten equation.

175

176 **16. Effect of pH on the POD-like activity of HPC**

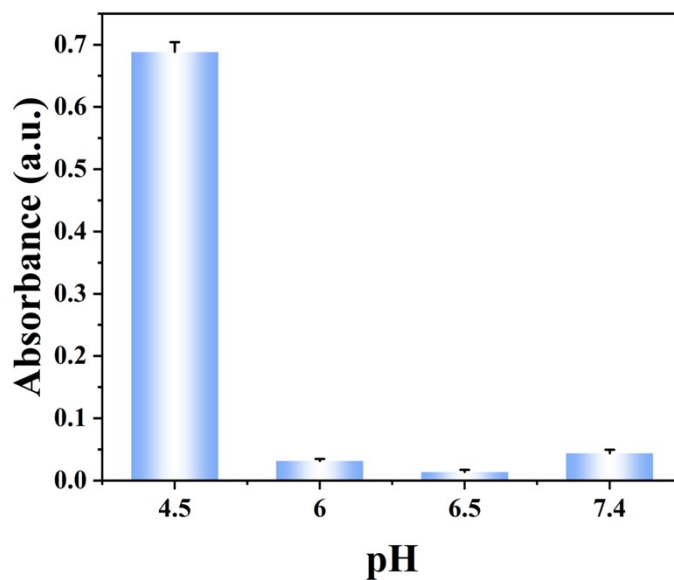

177

178

**Fig. S13.** The absorbance at 655 nm of oxTMB catalyzed by HPC under different pH.

179 17. UV-vis absorbance spectral changes of DPBF over time after different treatments

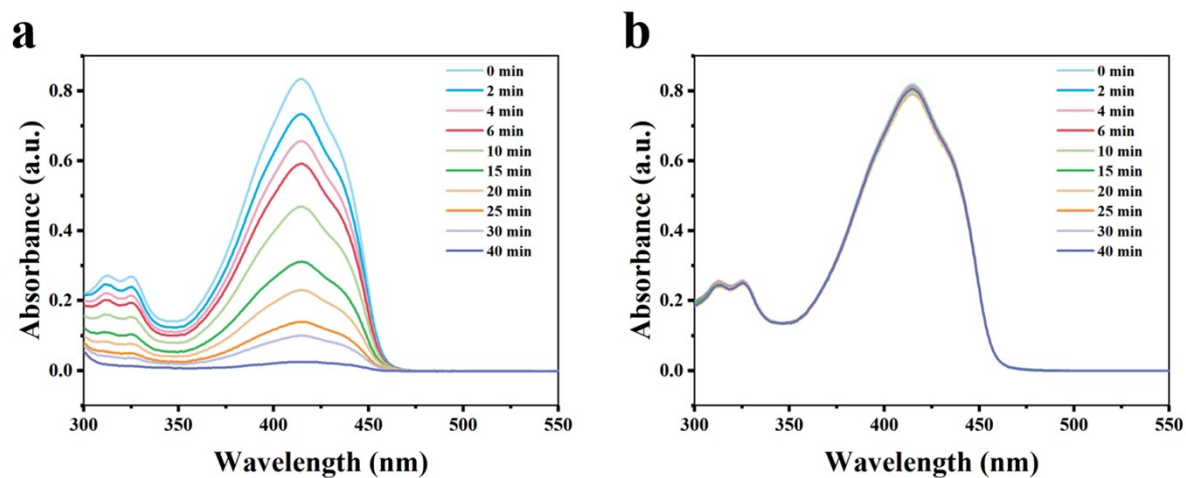

180

181 Fig. S14. UV-vis absorption spectra changes of DPBF over time with (a) and without (b) light irradiation in  
182 the presence of HPC.

183

184 18. The  $^1\text{O}_2$  generating ability of  $\text{CeO}_2$  nanozyme

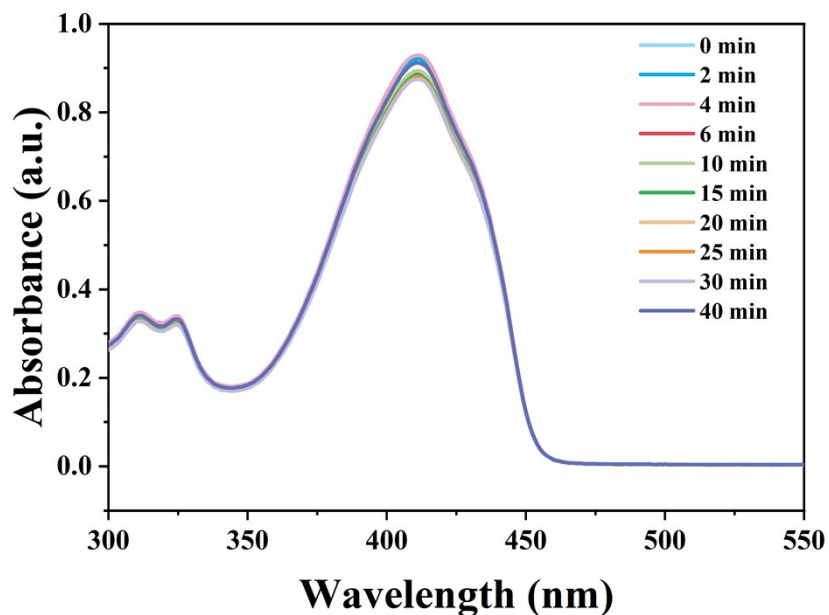

185

186 Fig. S15. UV-vis absorption spectrum changes of DPBF over time with light irradiation in the presence of  
187 nano  $\text{CeO}_2$ .

188

189 **19. Fluorescence spectral changes of HPC over time after different treatments**

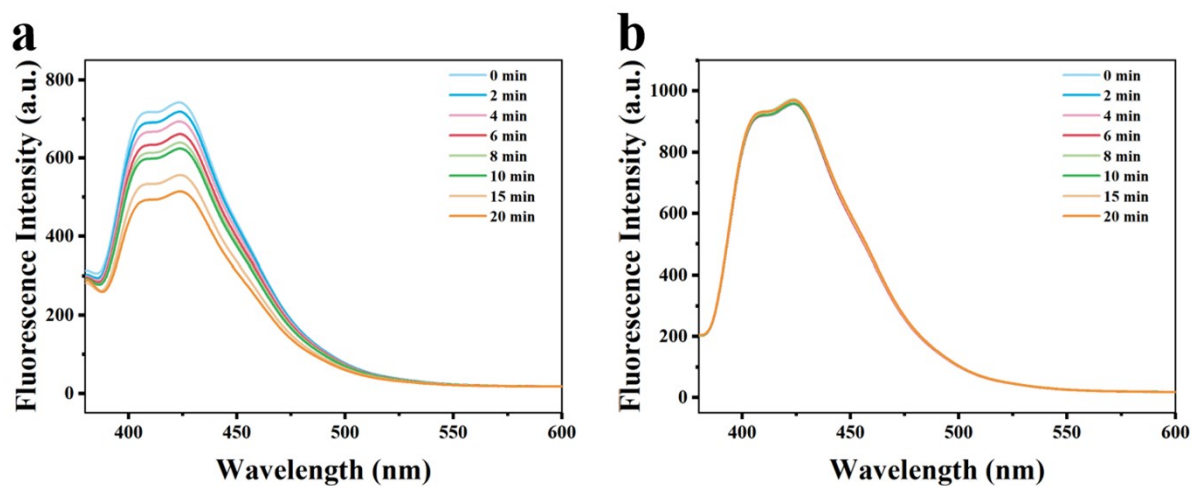

190

191 **Fig. S16.** Fluorescence spectral changes of HPC over time (a) with or (b) without light irradiation under  
192 normoxic conditions.

193

194 **20. Schematic diagram of the reaction between H<sub>4</sub>adip and <sup>1</sup>O<sub>2</sub>**

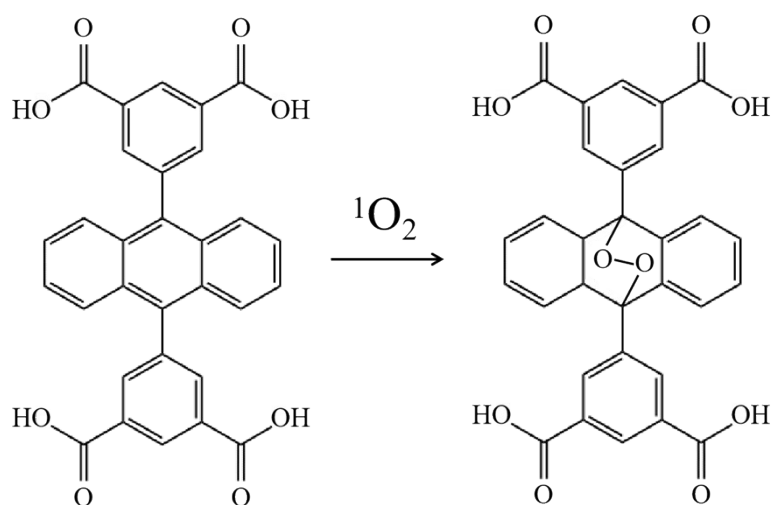

195

196

**Fig. S17.** Schematic diagram of the reaction between H<sub>4</sub>adip and <sup>1</sup>O<sub>2</sub>.

197

198 **21. Validation of HPC sensitivity for  $^1\text{O}_2$  detection using the  $\text{Na}_2\text{MoO}_4/\text{H}_2\text{O}_2$  system**

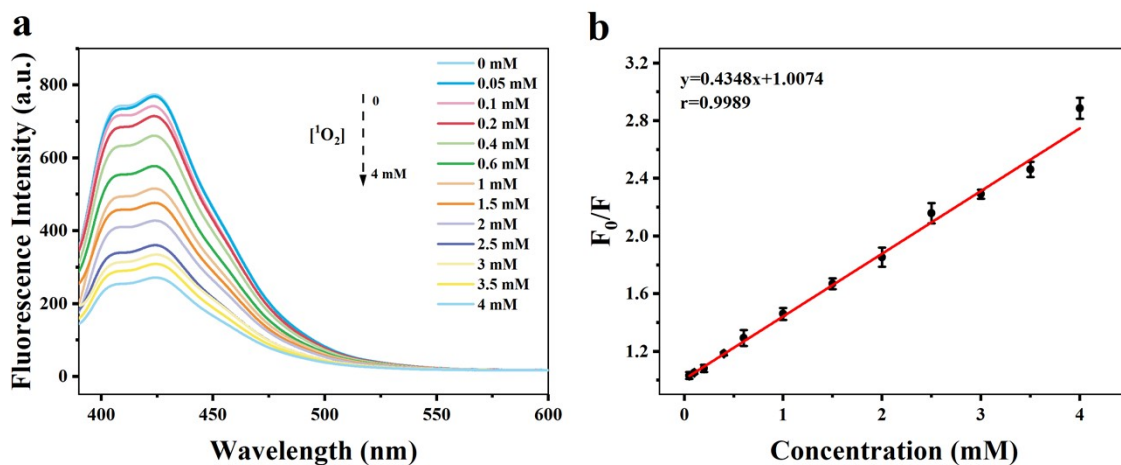

199

200 **Fig. S18.** (a) Fluorescence spectrum changes of HPC in the presence of  $^1\text{O}_2$  with concentrations from 0 to 4

201 mM ( $\lambda_{\text{ex}} = 379$  nm,  $\lambda_{\text{em}} = 390$ -600 nm). (b)  $F_0/F$  changes of HPC in the presence of  $^1\text{O}_2$  with concentrations

202 from 0.05 to 4 mM.

203

204 **22. The result of biological safety**

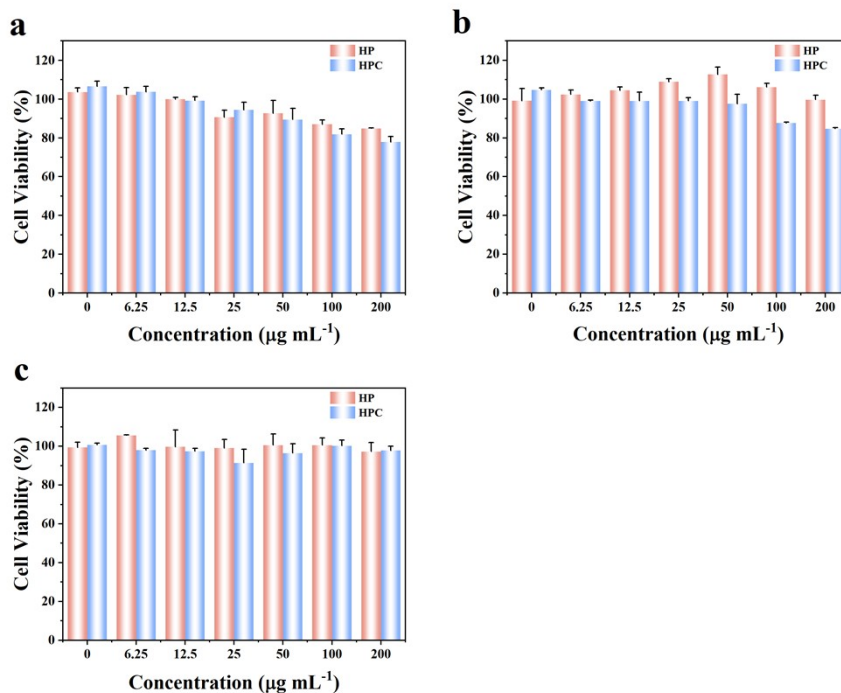

205

206 Fig. S19. Cell viability of (a) HepaRG hepatocytes, (b) HK-2 renal cells, and (c) 293T cells treated with  
207 different concentrations of HP or HPC in the absence of light irradiation.

208 **23. Cytotoxicity of H<sub>2</sub>O<sub>2</sub>**

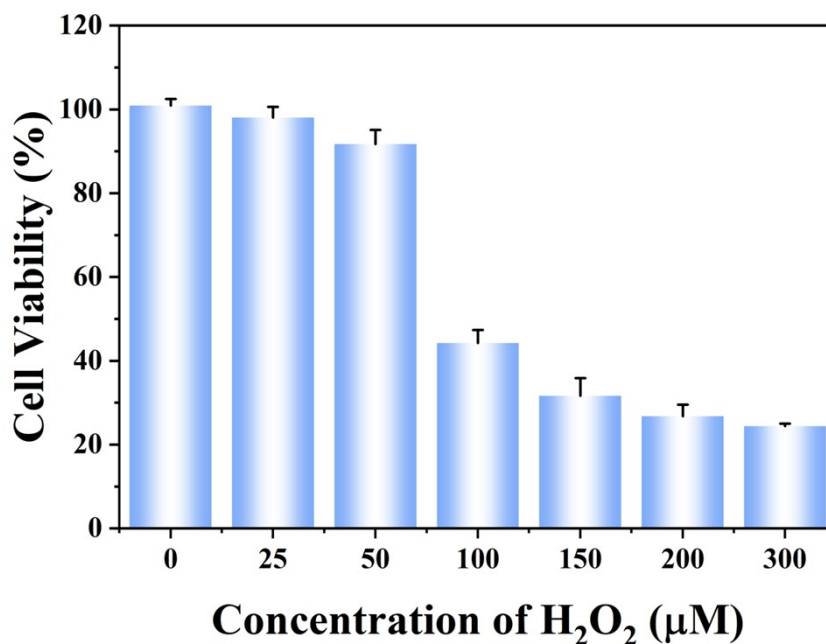

209  
210  
211

Fig. S20. Viability of MCF-7 cells incubated with H<sub>2</sub>O<sub>2</sub>.

212 **24. Cell viability of MCF-7 cells under different irradiation time**

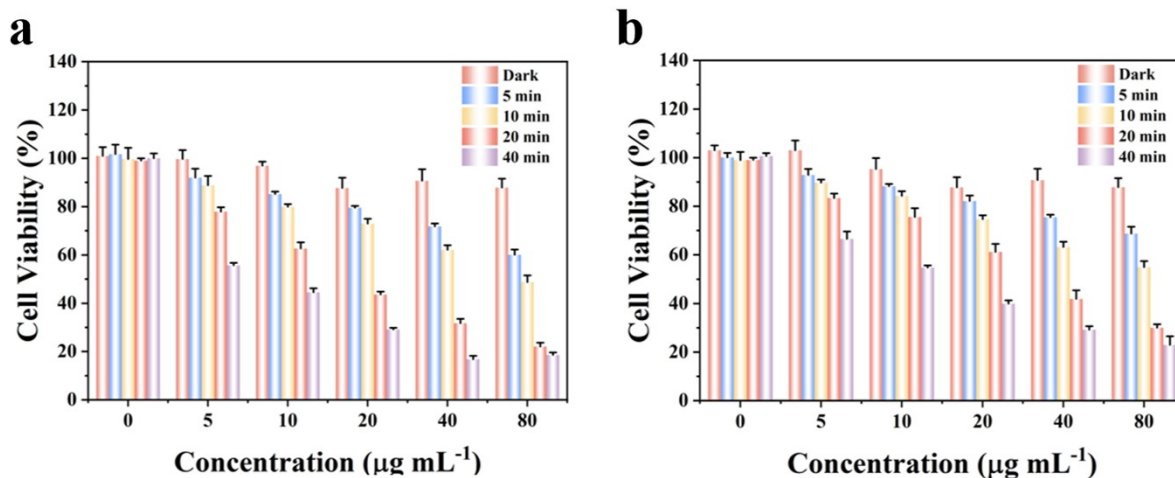

213

214 **Fig. S21.** Cell viability of MCF-7 cells treated with (a) HPC or (b) HP with different concentrations under  
215 different laser irradiation times.

217 **25. Cytotoxicity of ·OH**

218 To evaluate the killing effect of ·OH catalytically produced by HP and HPC on tumor  
219 cells, the experimental procedure was similar to the cytobiocompatibility assay. First, cells were  
220 inoculated into 96-well plates at a density of  $1 \times 10^3$  cells per well and 200  $\mu\text{L}$  per well, with  
221 three replicates per group, and incubated in an incubator for 24 h. After pouring off the original  
222 medium, HP and HPC mixtures with concentrations of 0, 5, 10, 20, 40 and 80  $\mu\text{g} \cdot \text{mL}^{-1}$  were  
223 added, and the blank control group was added with equal amounts of PBS. 12 h later, 50  $\mu\text{M}$   
224  $\text{H}_2\text{O}_2$  was added to each well, and the cells were incubated for 4 h for comparison of MTT  
225 effects.

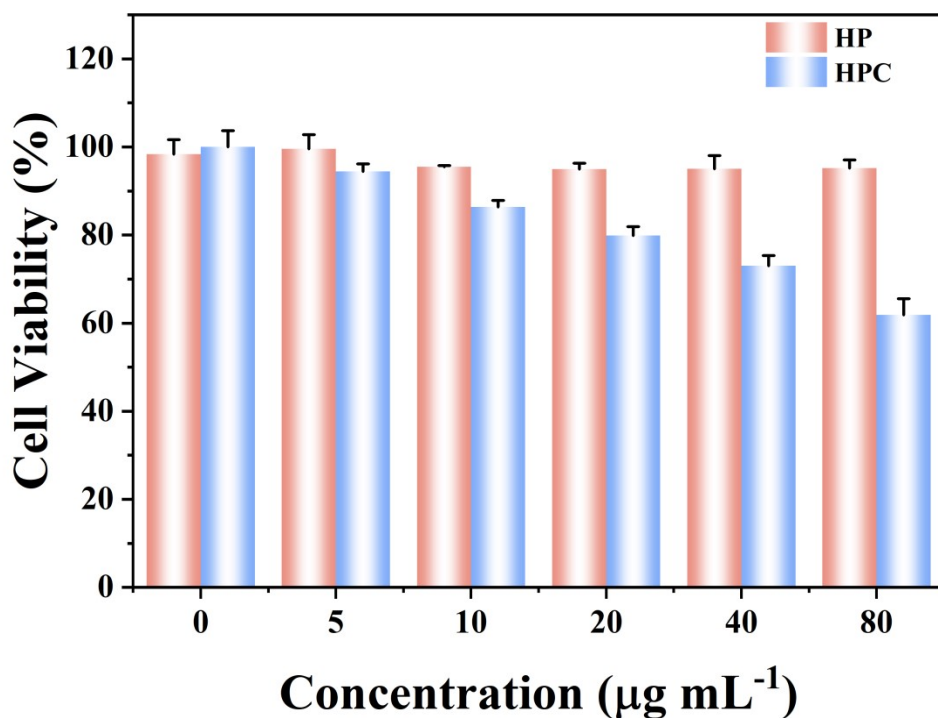

226

227 **Fig. S22.** Cell viability of MCF-7 cells treated with different concentrations of HPC and  $\text{H}_2\text{O}_2$  (50  $\mu\text{M}$ ).

229 **26. Live/dead staining**

230 MCF-7 cells ( $5 \times 10^4$  cells per well) were seeded and cultured in 24-well plates for 24 h at  
231 37°C Next, cells were grouped and treated with HP+H<sub>2</sub>O<sub>2</sub>, HPC+H<sub>2</sub>O<sub>2</sub>, HP+laser, HPC+laser,  
232 HP+H<sub>2</sub>O<sub>2</sub>+laser, and HPC+H<sub>2</sub>O<sub>2</sub>+laser. After washing several times with PBS, calcein-AM (2  
233  $\mu\text{mol L}^{-1}$ ) and PI (4  $\mu\text{mol L}^{-1}$ ) were added to stain the cells. Fluorescence images were taken  
234 using an inverted fluorescence microscope.

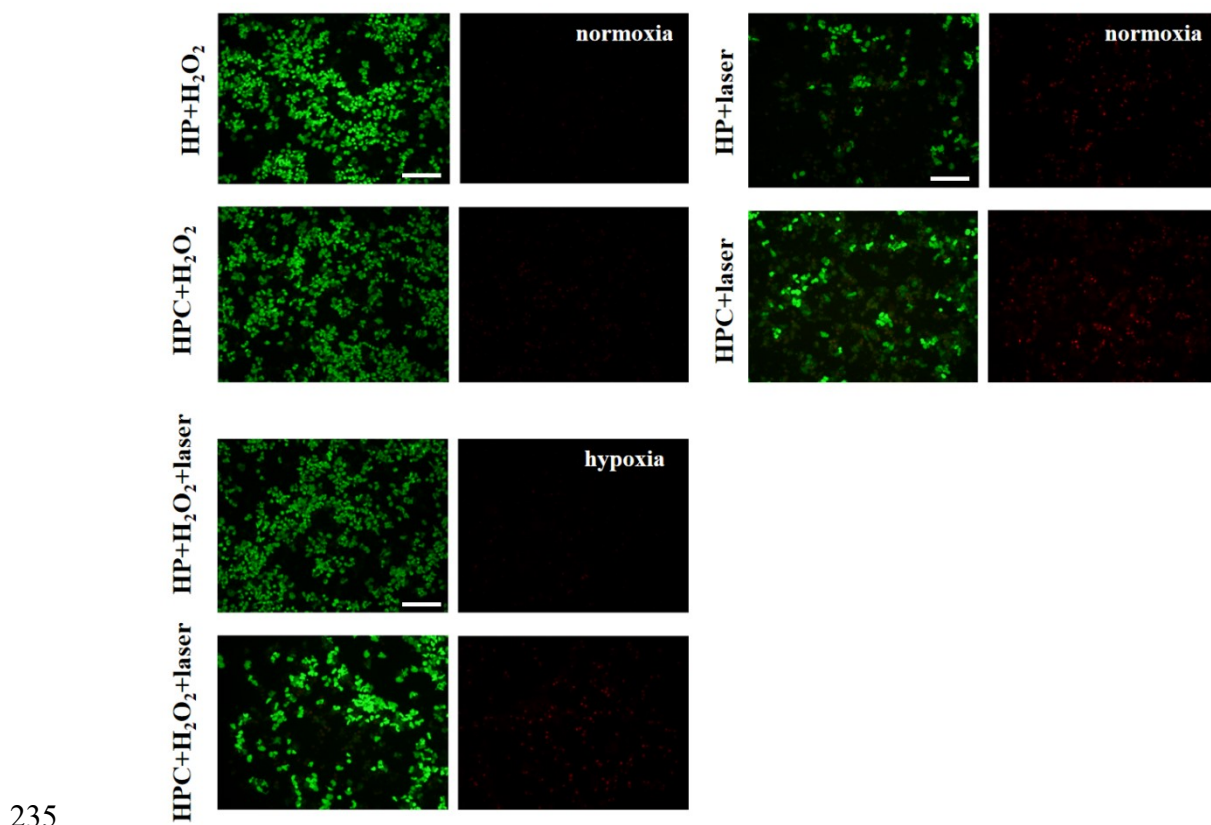

236 **Fig. S23.** Live/dead cell assay for MCF-7 cells treated with HP or HPC, scale bar = 100  $\mu\text{m}$ . (green: live  
237 cells, red: dead cells).

238

239

240

241 **27. Recently reported nanomaterials-based methods for determination of  $^1\text{O}_2$**

242 **Table. S2.** An overview on recently reported nanomaterials-based methods for determination of  $^1\text{O}_2$ .

| Probe/Material                                          | $^1\text{O}_2$ -trap | Linear range          | LOD                | Ref.      |
|---------------------------------------------------------|----------------------|-----------------------|--------------------|-----------|
| EuPS@AnC/ZIF-8 NPs                                      | Anthracene           | 0.5-200 $\mu\text{M}$ | 43 nM              | 1         |
| ICG-DPBF-PFP/conjugated polymer hybrid NPs              | DPBF                 | 0-2 mM                | 28 $\mu\text{M}$   | 2         |
| PEG-AuNPs-PCN-224/DPA                                   | Anthracene           | 0.1-3.5 $\mu\text{M}$ | 35.8 $\mu\text{M}$ | 3         |
| $\text{Fe}_3\text{O}_4$ @PCN-224@CaO <sub>2</sub> -ABDA | Anthracene           | 0.15-2.5 mM           | 60.6 $\mu\text{M}$ | 4         |
| DSPE-SS-PEG <sub>2k</sub> @TPP@TCPP@DPA-MOF             | Anthracene           | 0-4 mM                | 63.9 $\mu\text{M}$ | 5         |
| TCPP@DPA-MOF-Pt NPs                                     | Anthracene           | 0.2-4 mM              | 64.9 $\mu\text{M}$ | 6         |
| H <sub>4</sub> adip@PCN-222@CeO <sub>2</sub>            | Anthracene           | 0.05-4 mM             | 43.4 $\mu\text{M}$ | This work |

243

244 **References**

- 245 1. J. Gao, C. Wang and H. Tan, *Journal of Materials Chemistry B*, 2017, **5**, 9175–9182.
- 246 2. X.-h. Wang, Y.-x. Yu, K. Cheng, W. Yang, Y.-a. Liu and H.-s. Peng, *Microchimica Acta*, 2019,
- 247 **186**, 842.
- 248 3. L. Yu, L. Feng, L. Xiong, S. Li, Q. Xu, X. Pan and Y. Xiao, *ACS Applied Materials & Interfaces*,
- 249 2021, **13**, 11646–11656.
- 250 4. Y. Yang, N. Li, Y. Zhu, J. Li, S. Li and X. Hou, *Talanta*, 2023, **259**, 124493.
- 251 5. S. Li, F. Yang, Y. Wang, L. Jia and X. Hou, *Materials Horizons*, 2023, **10**, 5734–5752.

252 6. T. Entradas, S. Waldron and M. Volk, *Journal of Photochemistry and Photobiology B:*

253 *Biology*, 2020, **204**, 111787.

254
